# Supplementary material for: A humanized anaplastic lymphoma kinase (ALK)-directed antibody-drug conjugate with pyrrolobenzodiazepine payload demonstrates efficacy in ALK-expressing cancers
Source: Springer Nature journal article supplement (doi:10.1038/s41467-025-62979-1), 2025-08-15
Supplement: MOESM1 [file 41467_2025_62979_MOESM1_ESM.pdf › 41467_2025_62979_MOESM1_ESM.pdf]

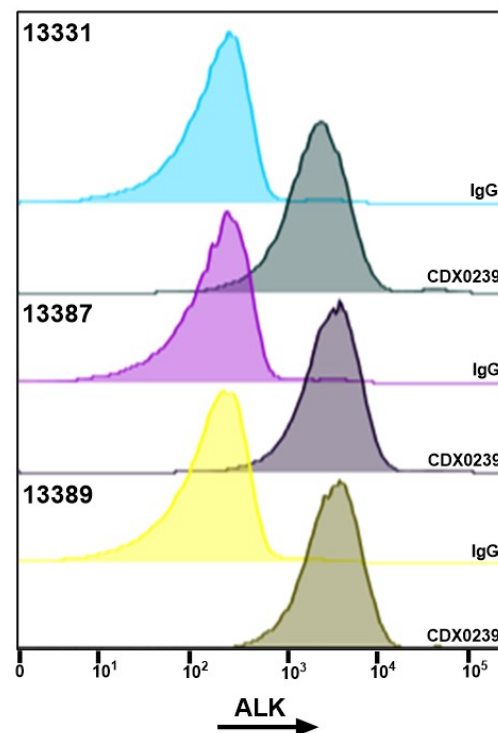

**Supplemental Figure 1. CDX0239 binds to cell surface ALK in spontaneous murine neuroblastoma tumors.** Flow cytometry histograms for ALK using CDX0239 compared to IgG control in spontaneously occurring murine neuroblastoma tumors 13331, 13387, and 13389 derived from Th-MYCN models. Represented data has been validated with at least 3 independent experiments from different biological samples derived from the spontaneous tumors of individual mice.

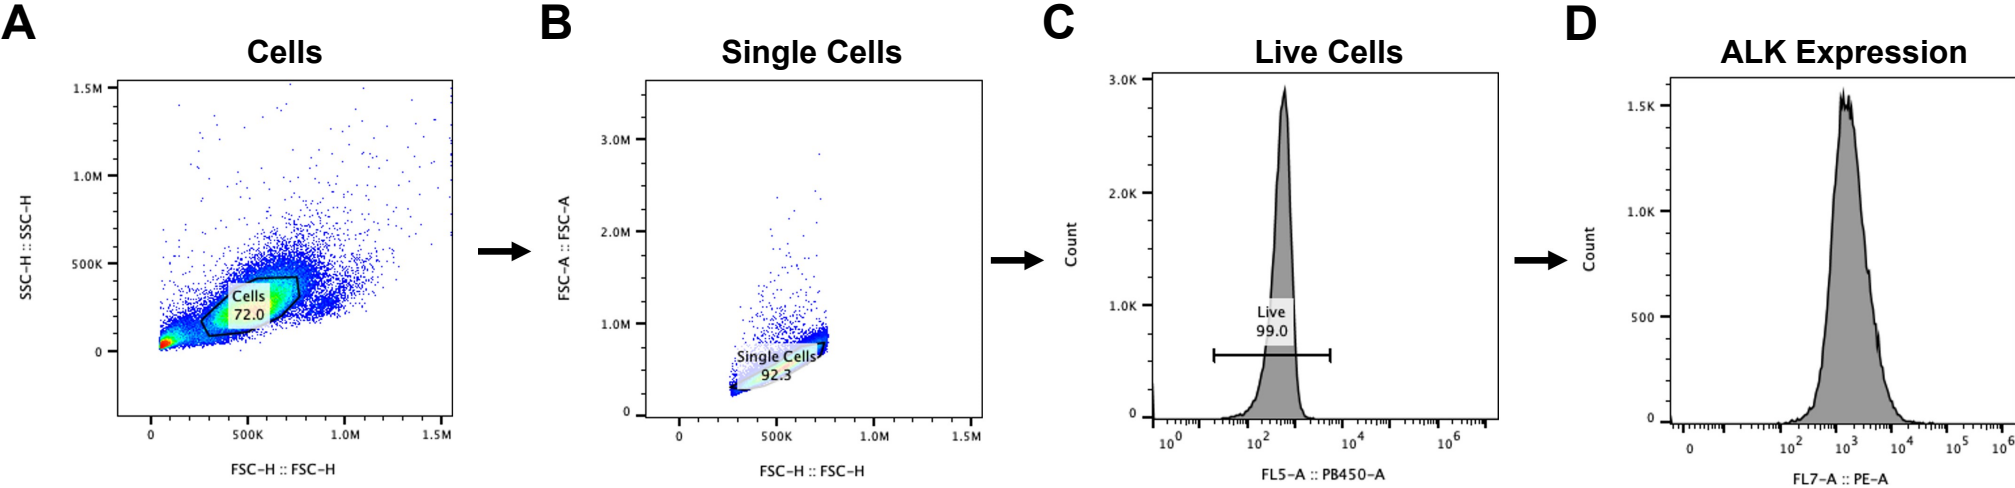

**Supplemental Figure 2. Gating strategy for flow cytometry analysis for ALK surface expression after mouse cell depletion.** (A) Side scatter height vs forward scatter height plot for gating removal of debris. (B) Forward scatter area vs forward scatter height plot for gating of single cells. (C) PB450-A positive cell population histogram for analysis of live cells. (D) PE positive cell population histogram for analysis of ALK cell surface expression.

A

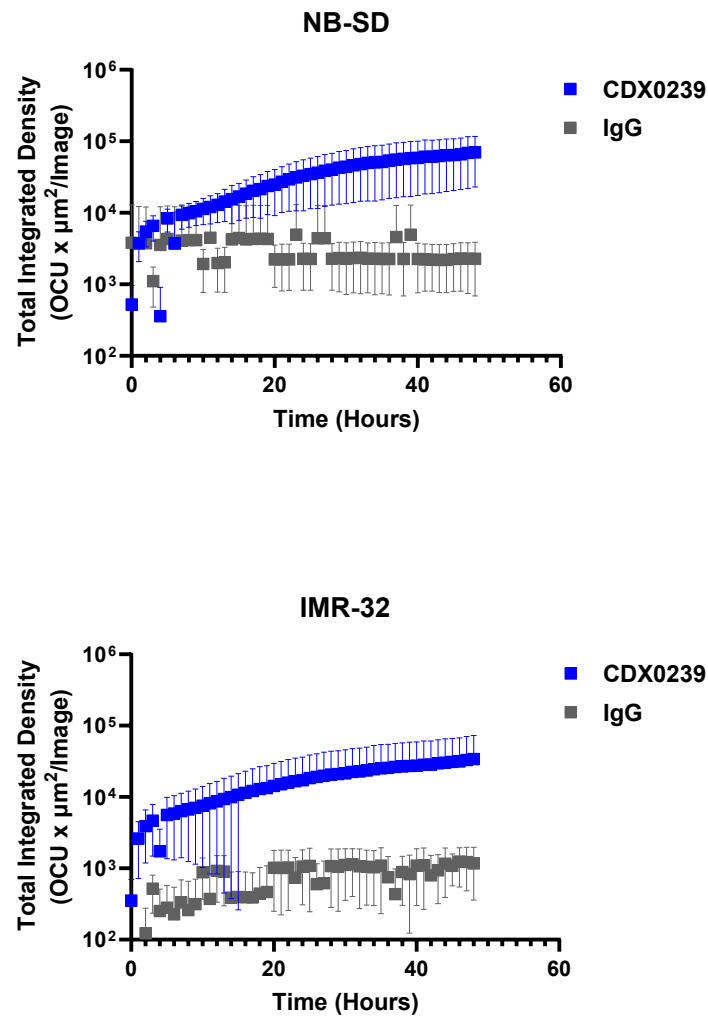

B

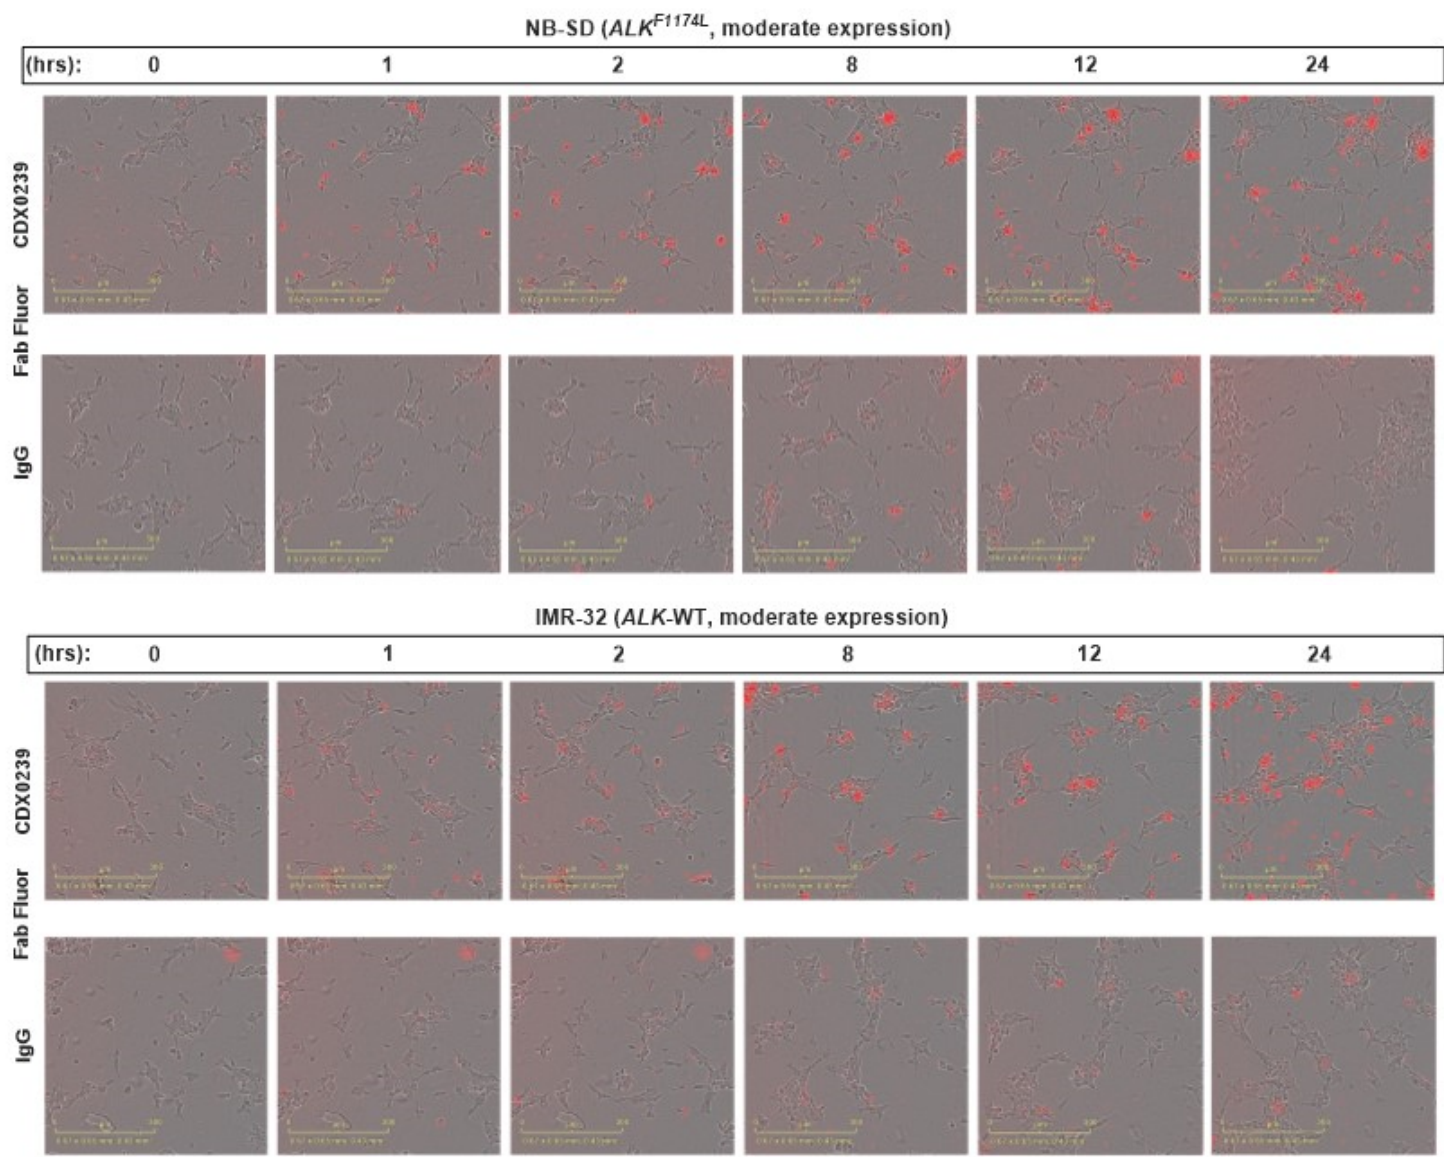

**Supplemental Figure 3. CDX0239 is internalized in moderate surface ALK-expressing neuroblastoma cell lines.** (A) Quantification of internalized Fabfluor-conjugated CDX0239 (blue line with squares) compared to Fabfluor-conjugated IgG control (grey line with squares) in NB-SD and IMR-32 cell lines plotted as total integrated density mean  $\pm$  standard deviation over 48 hours with  $n=3$  technical replicates for the CDX0239 condition in NB-SD and  $n=6$  technical replicates for all other conditions. Sample size and datasets are located within the Source Data File. Source data are provided as a Source Data File. (B) Pictographs of the internalization of Fabfluor-conjugated CDX0239 compared to Fabfluor-conjugated IgG in NB-SD and IMR-32 cell lines over 24 hours and represented data has been validated with at least 2 independent experiments.

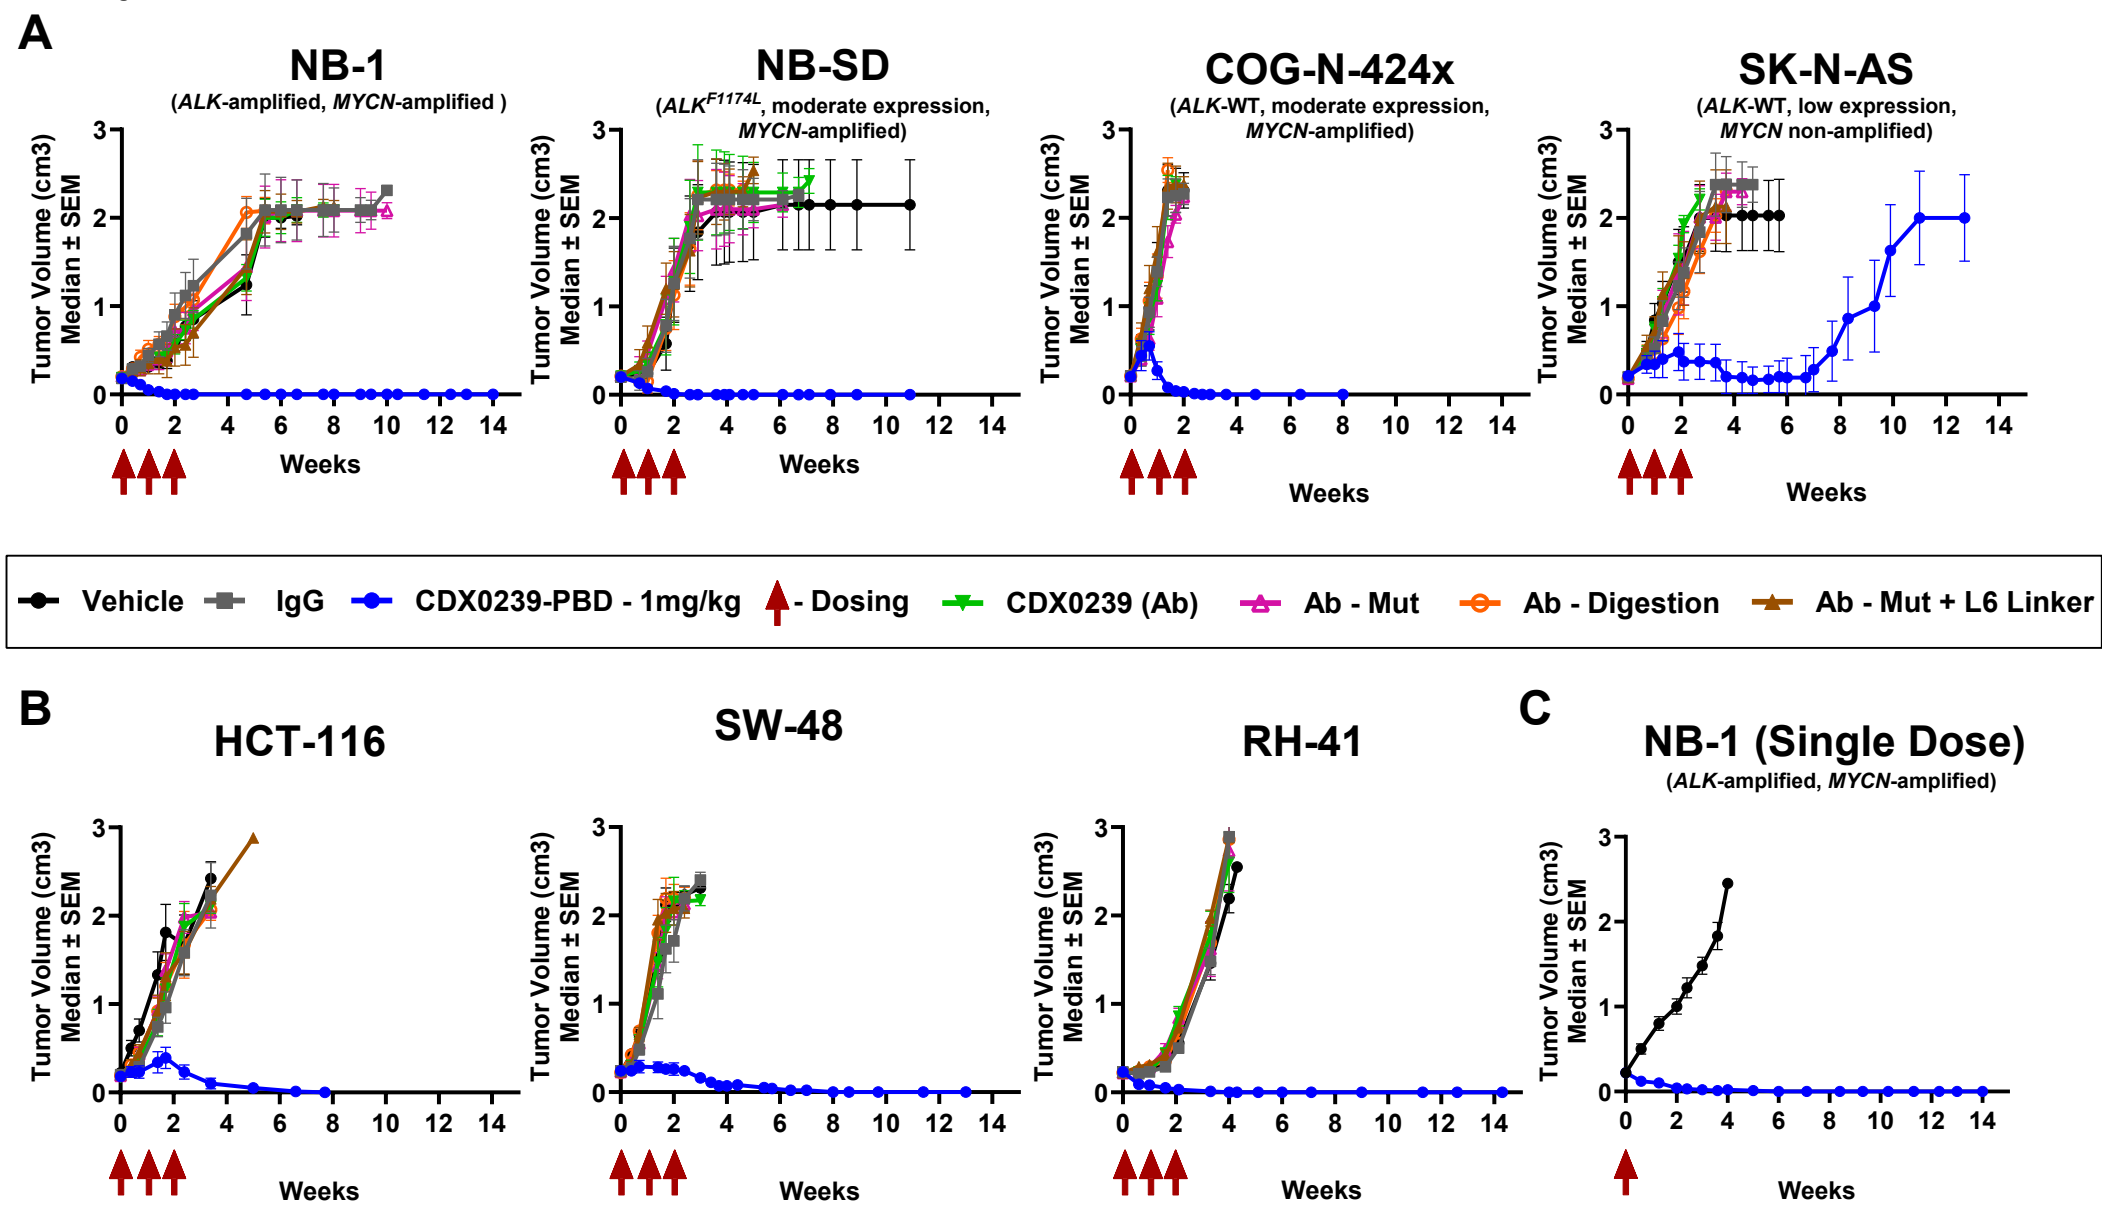

**Supplemental Figure 4. CDX0239-PBD demonstrates potent *in vivo* antitumor activity in ALK-expressing xenograft models compared to multiple controls. (A)** Average tumor volume in neuroblastoma xenograft models NB-1, NB-SD, COG-N-424x, and SK-N-AS and **(B)** average tumor volume colorectal carcinoma xenograft models HCT-116 and SW-48 and fusion-positive rhabdomyosarcoma xenograft model with 3 weekly treatments of 1 mg/kg CDX0239-PBD (blue line with circles) compared to IgG (grey line with squares), normal saline vehicle (black line with circles), CDX0239 (Ab, green line with triangles), CDX0239 with deglycosylation via asparagine to alanine mutation (Ab – Mut, pink line with triangles), CDX0239 with deglycosylation via enzymatic digestion (Ab – Digestion, orange line with circles), and CDX0239 with deglycosylation via asparagine to alanine mutation and with linker (Ab - Mut + L6 Linker, brown line with triangles). **(C)** Average tumor volume in neuroblastoma xenograft model NB-1 with a single 1 mg/kg dose of CDX0239-PBD (blue line with circles) compared to normal saline vehicle (black line with circles). All data are plotted as mean ± standard deviation with n=5 mice per treatment condition for all experiments, and each experiment was completed once. Exact p-values and datasets are located within the Source Data file. Source data are provided as a Source Data file.

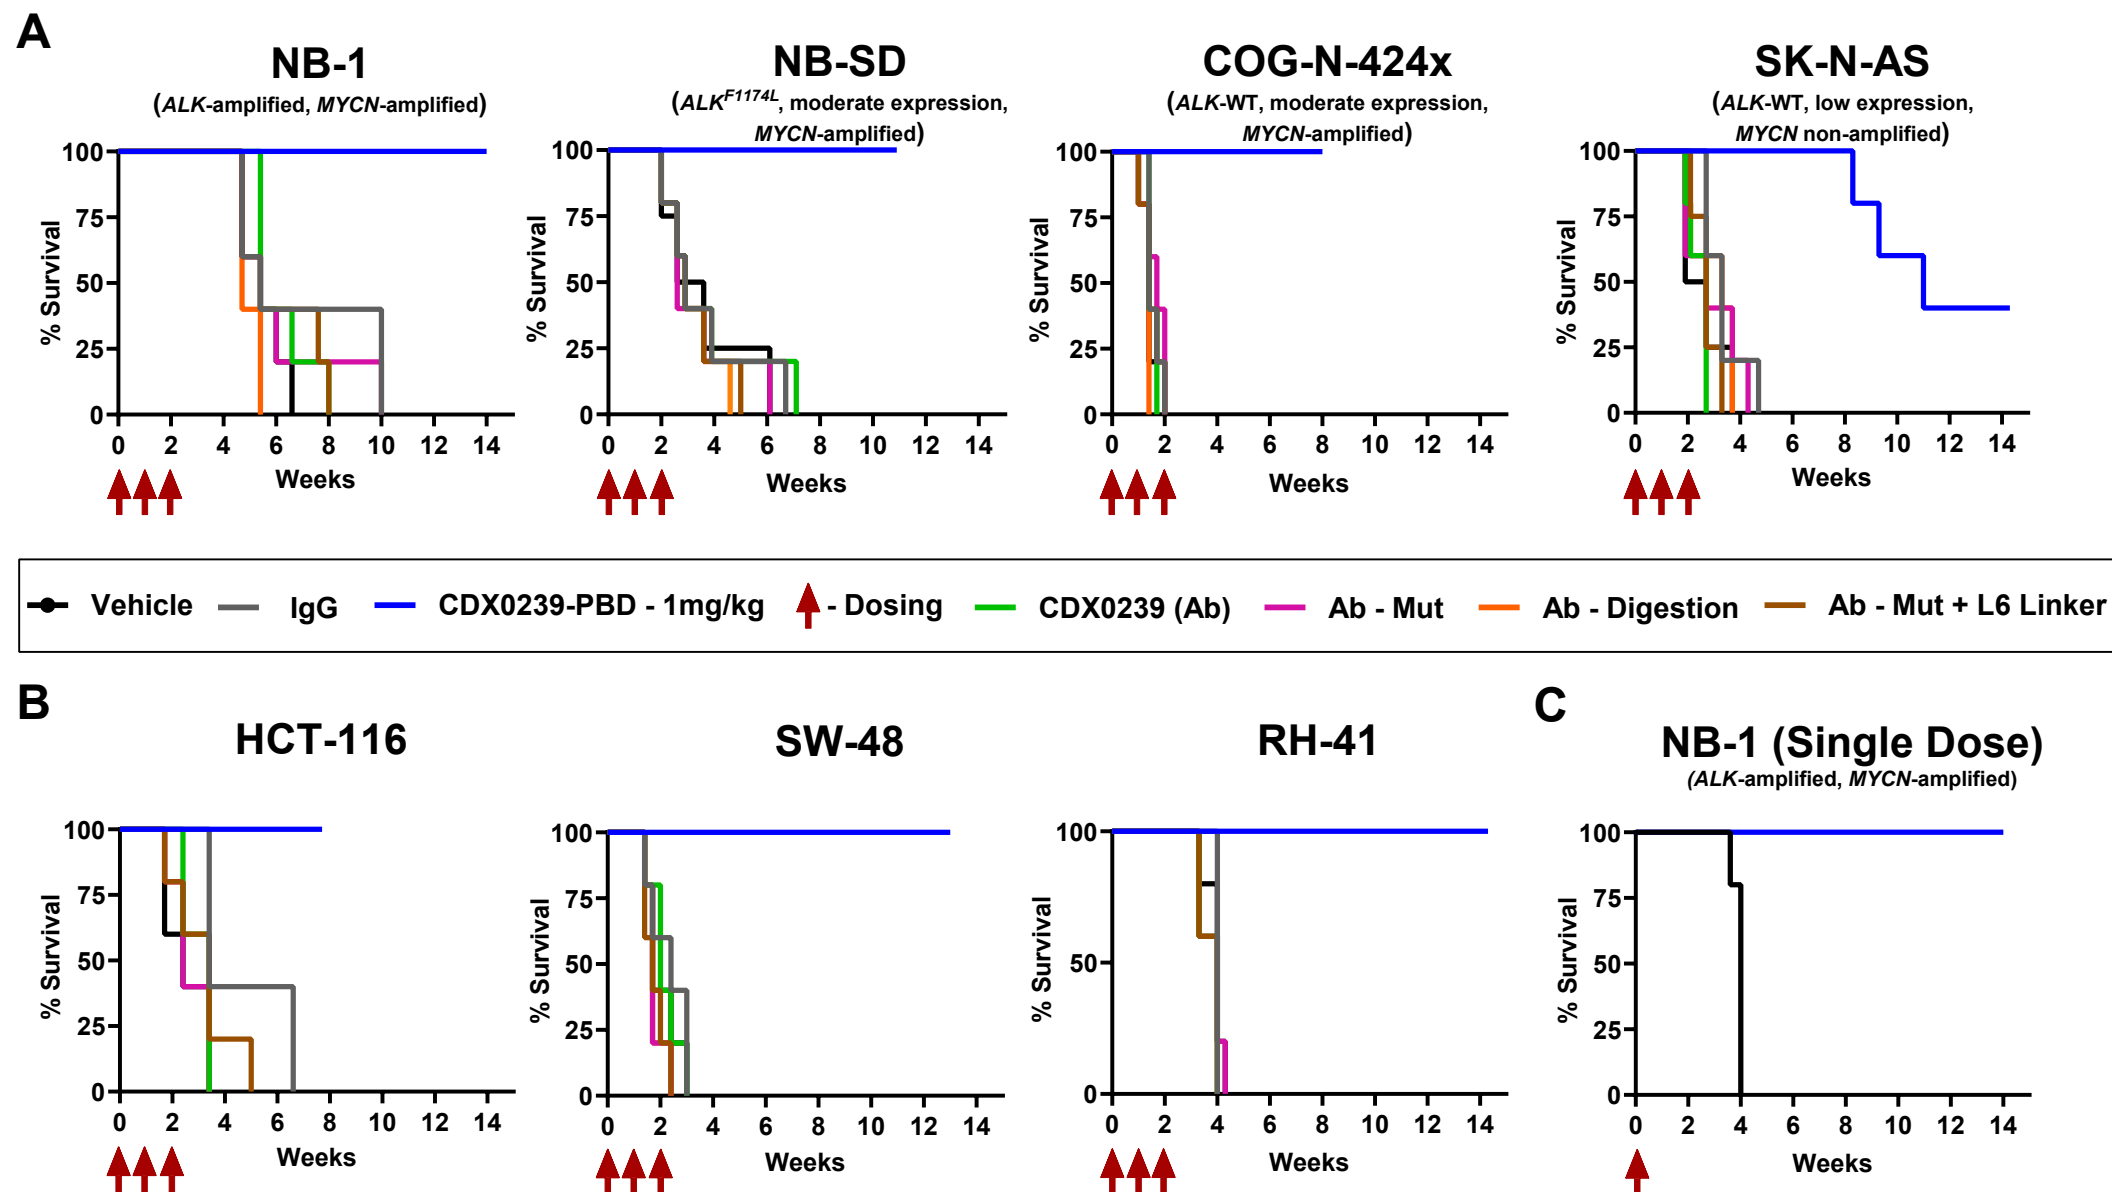

**Supplemental Figure 5. Treatment with CDX0239-PBD leads to survival in *ALK*-expressing xenograft models compared to multiple controls.** (A) Overall survival of neuroblastoma xenograft models NB-1, NB-SD, COG-N-424x, and SK-N-AS and (B) overall survival of colorectal carcinoma xenograft models HCT-116 and SW-48 and fusion-positive rhabdomyosarcoma xenograft model with 3 weekly treatments of 1 mg/kg CDX0239-PBD (blue line) compared to IgG (grey line), normal saline vehicle (black line), CDX0239 (Ab, green line), CDX0239 with deglycosylation via asparagine to alanine mutation (Ab – Mut, pink line), CDX0239 with deglycosylation via enzymatic digestion (Ab – Digestion, orange line), and CDX0239 with deglycosylation via asparagine to alanine mutation and with linker (Ab - Mut + L6 Linker, brown line). (C) Overall survival of neuroblastoma xenograft model NB-1 with a single 1 mg/kg dose of CDX0239-PBD (blue line) compared to normal saline vehicle (black line). Each treatment condition includes a sample size of n=5 mice and each experiment was completed once. Exact p-values and datasets are located within the Source Data file. Source data are provided as a Source Data file.

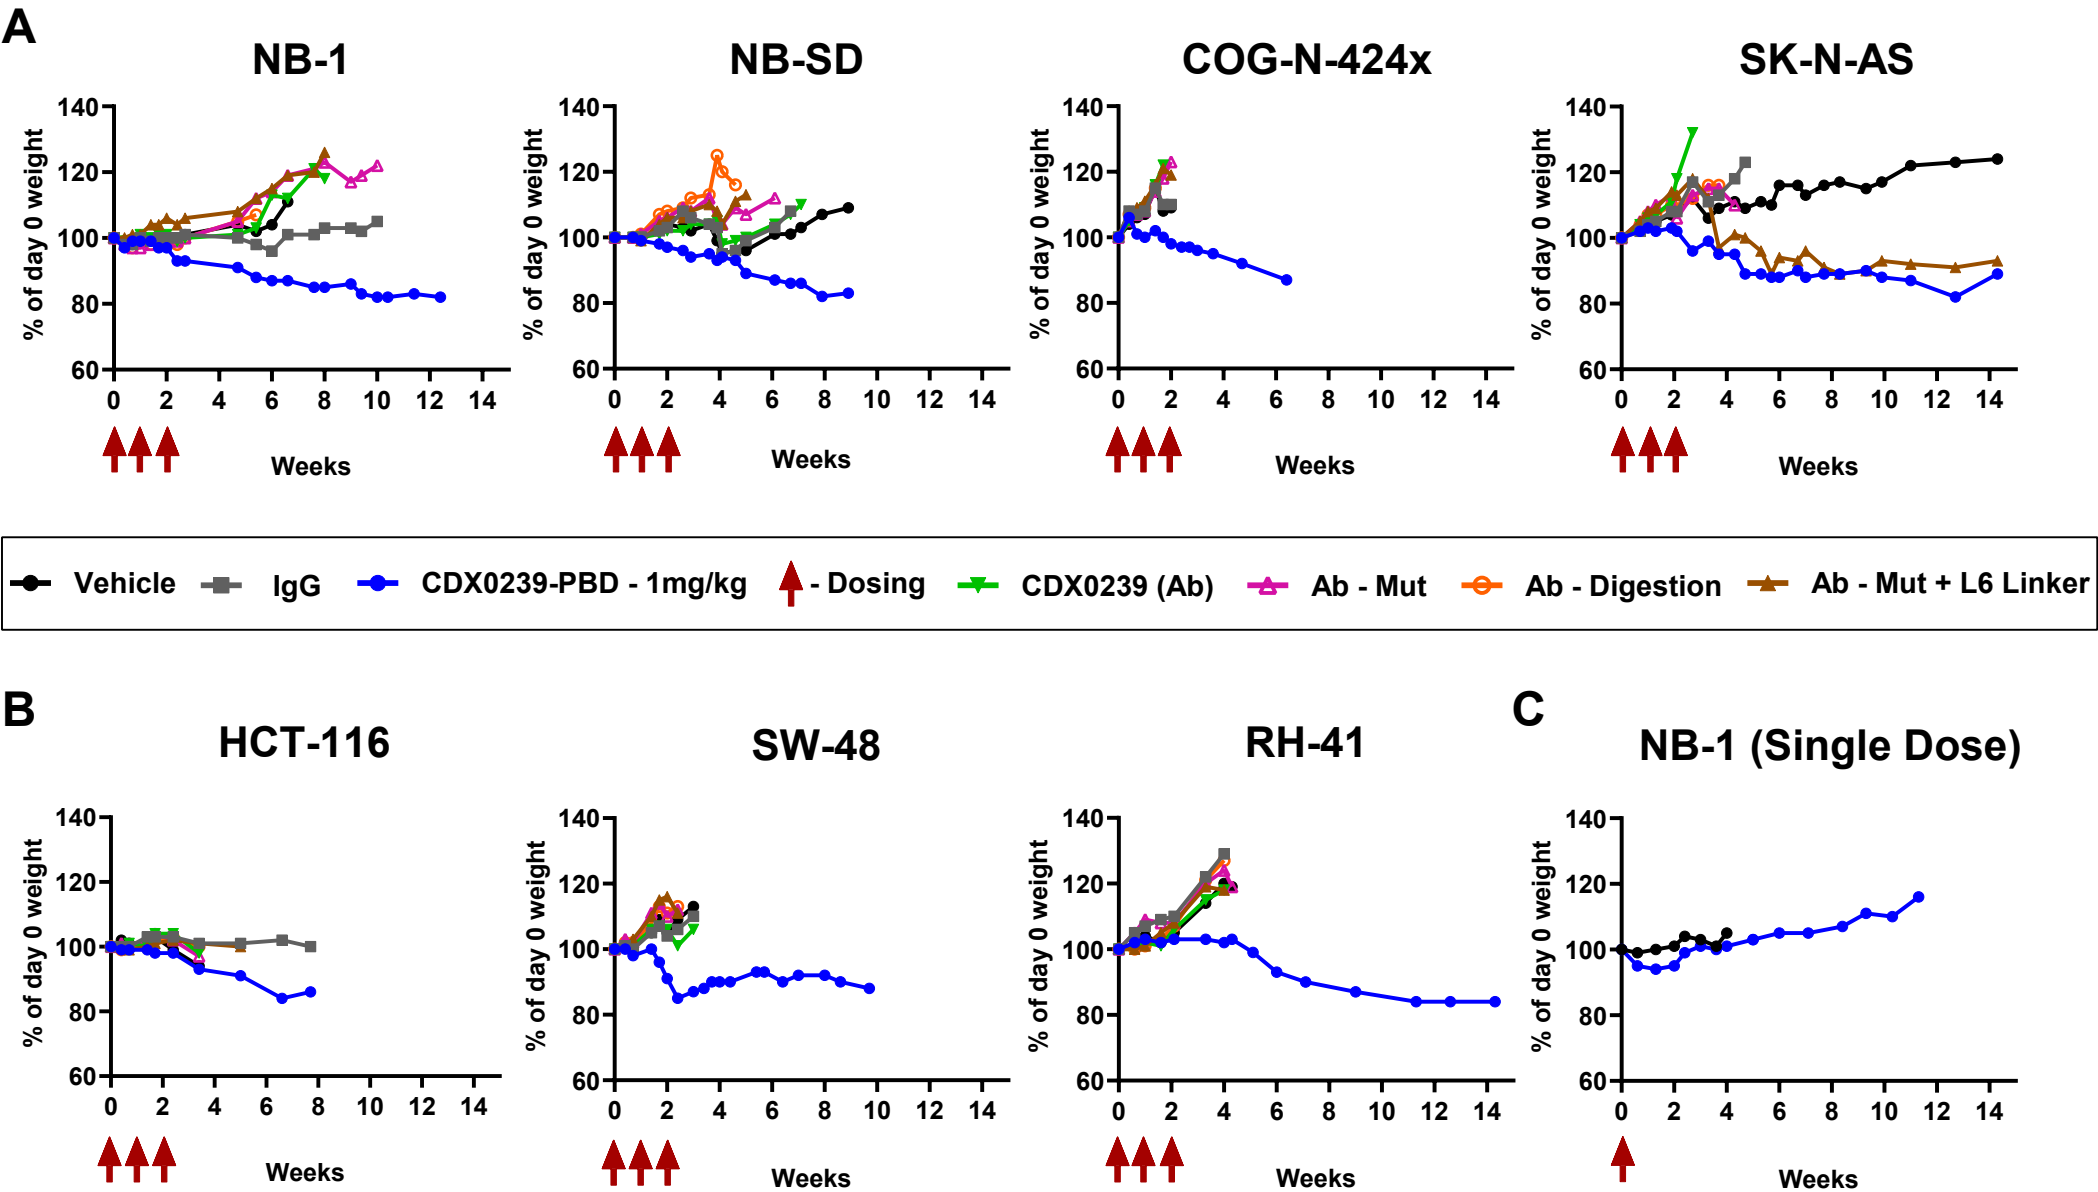

**Supplemental Figure 6. Murine weights after treatment of CDX0239-PBD compared to multiple controls.** (A) Murine weights of neuroblastoma xenograft models NB-1, NB-SD, COG-N-424x, and SK-N-AS and (B) murine weights of colorectal carcinoma xenograft models HCT-116 and SW-48 and fusion-positive rhabdomyosarcoma xenograft model with 3 weekly treatments of 1 mg/kg CDX0239-PBD (blue line with circles) compared to IgG (grey line with squares), normal saline vehicle (black line with circles), CDX0239 (Ab, green line with triangles), CDX0239 with deglycosylation via asparagine to alanine mutation (Ab – Mut, pink line with triangles), CDX0239 with deglycosylation via enzymatic digestion (Ab – Digestion, orange line with circles), and CDX0239 with deglycosylation via asparagine to alanine mutation and with linker (Ab - Mut + L6 Linker, brown line with triangles). (C) Murine weights of neuroblastoma xenograft model NB-1 with a single 1 mg/kg dose of CDX0239-PBD (blue line with circles) compared to normal saline vehicle (black line with circles). All data are plotted as mean weights from a total of n=5 mice per treatment condition for all experiments, and each experiment was completed once. Datasets are located within the Source Data file. Source data are provided as a Source Data file.

Supplemental Table 1

| Neoplastic Histology                                 | Mean TPM | Median TPM | SD TPM | N   | Neoplastic Histology                    | Mean TPM | Median TPM | SD TPM | N    |
|------------------------------------------------------|----------|------------|--------|-----|-----------------------------------------|----------|------------|--------|------|
| Neuroblastoma                                        | 37.78    | 21.64      | 102.52 | 201 | Infantile Fibrosarcoma                  | 1.11     | 1.11       | 0.11   | 2    |
| Fusion + Rhabdomyosarcoma                            | 23.55    | 17.69      | 20.96  | 49  | Uterine Corpus Endometrioid Carcinoma   | 1.48     | 1.10       | 1.48   | 181  |
| Dysembryoplastic Neuroepithelial Tumor               | 8.61     | 8.13       | 5.21   | 14  | Sarcoma                                 | 2.80     | 1.10       | 8.96   | 61   |
| Retinoblastoma†                                      | 7.55     | 7.55       | 1.46   | 2   | Desmoplastic Small Round Cell Tumor     | 1.38     | 1.10       | 0.56   | 8    |
| Ewing Sarcoma                                        | 9.78     | 6.75       | 9.27   | 85  | Breast Invasive Carcinoma               | 1.20     | 1.09       | 0.53   | 1099 |
| Ganglioglioma                                        | 5.33     | 2.62       | 7.98   | 47  | Kidney Papillary Cell Carcinoma         | 1.47     | 1.08       | 2.39   | 289  |
| Glioblastoma Multiforme                              | 4.03     | 2.47       | 4.93   | 200 | Kidney Clear Cell Carcinoma             | 1.18     | 1.08       | 0.32   | 532  |
| Cutaneous Melanoma                                   | 6.91     | 2.27       | 38.75  | 469 | Undifferentiated Pleomorphic Sarcoma    | 1.74     | 1.08       | 1.85   | 47   |
| Diffuse Midline Glioma                               | 3.94     | 2.25       | 6.62   | 82  | Undifferentiated Hepatic Sarcoma        | 1.08     | 1.08       | 0.11   | 2    |
| High-Grade Glioma/Astrocytoma                        | 2.95     | 0.72       | 6.18   | 149 | Thymoma                                 | 1.15     | 1.07       | 0.29   | 119  |
| Melanoma                                             | 6.74     | 6.36       | 3.56   | 7   | Dedifferentiated Liposarcoma            | 1.29     | 1.06       | 0.85   | 50   |
| Embryonal Tumor with Multilayered Rosettes           | 5.73     | 5.73       | 6.26   | 2   | Adrenocortical Carcinoma                | 1.45     | 1.06       | 2.90   | 96   |
| Spindle Cell/Sclerosing Rhabdomyosarcoma             | 5.51     | 3.43       | 5.87   | 5   | Prostate Adenocarcinoma                 | 1.07     | 1.05       | 0.075  | 496  |
| Uveal Melanoma                                       | 5.42     | 3.18       | 6.36   | 79  | Esophageal Carcinoma                    | 1.10     | 1.05       | 0.14   | 182  |
| Pheochromocytoma & Paraganglioma                     | 4.80     | 2.76       | 6.31   | 184 | Undifferentiated Sarcoma Nos            | 1.09     | 1.05       | 0.09   | 13   |
| Neurofibroma                                         | 2.74     | 2.74       | 1.29   | 2   | Lymphoma                                | 1.09     | 1.05       | 0.10   | 50   |
| Desmoplastic Infantile Astrocytoma and Ganglioglioma | 5        | 2.73       | 4.98   | 3   | Gastrointestinal Stromal Tumor          | 1.25     | 1.05       | 0.35   | 7    |
| Synovial Sarcoma                                     | 3.47     | 2.49       | 2.46   | 41  | Cervical & Endocervical Cancer          | 1.12     | 1.04       | 0.28   | 306  |
| Germ Cell Tumor                                      | 2.35     | 2.35       | 0.49   | 2   | Stomach Adenocarcinoma                  | 1.10     | 1.04       | 0.25   | 414  |
| Ependymoma                                           | 2.43     | 2.23       | 1.27   | 102 | Head & Neck Squamous Cell Carcinoma     | 1.09     | 1.04       | 0.21   | 520  |
| Supratentorial Embryonal Tumor Nos                   | 6.10     | 2.19       | 8.28   | 19  | Osteosarcoma                            | 1.11     | 1.04       | 0.28   | 189  |
| Diffuse Intrinsic Pontine Glioma                     | 2.22     | 2.15       | 1.24   | 9   | Epithelioid Sarcoma                     | 1.04     | 1.04       | 0.01   | 3    |
| Thyroid Carcinoma                                    | 4.79     | 1.65       | 59.15  | 516 | Undifferentiated Spindle Cell Sarcoma   | 1.04     | 1.04       | 0.01   | 2    |
| Malignant Peripheral Nerve Sheath Tumor              | 4.73     | 1.61       | 5.70   | 9   | Leiomyosarcoma                          | 10.99    | 1.03       | 84.43  | 78   |
| Fusion - Rhabdomyosarcoma                            | 2.99     | 1.53       | 4.64   | 61  | Diffuse Large B-Cell Lymphoma           | 1.16     | 1.03       | 0.61   | 47   |
| Ovarian Serous Cystadenocarcinoma                    | 2.25     | 1.50       | 2.16   | 427 | Kidney Chromophobe                      | 1.10     | 1.03       | 0.23   | 66   |
| Myofibromatosis                                      | 1.48     | 1.48       | 0.68   | 2   | Hepatoblastoma                          | 1.35     | 1.03       | 0.94   | 19   |
| Nasopharyngeal Carcinoma                             | 5.26     | 1.44       | 6.97   | 3   | Bladder Urothelial Carcinoma            | 1.33     | 1.02       | 4.34   | 407  |
| Choroid Plexus Carcinoma                             | 2.33     | 1.39       | 2.85   | 26  | Cholangiocarcinoma                      | 1.06     | 1.02       | 0.08   | 37   |
| Uterine Carcinosarcoma                               | 1.92     | 1.36       | 2.37   | 57  | Rectum Adenocarcinoma                   | 1.07     | 1.02       | 0.34   | 93   |
| Thymic Carcinoma                                     | 1.33     | 1.33       | 0.36   | 2   | Acute Lymphoblastic Leukemia            | 1.09     | 1.02       | 0.40   | 878  |
| Meningioma                                           | 1.26     | 1.30       | 0.10   | 3   | Immunodeficient Soft Tissue Sarcoma Nos | 1.02     | 1.02       | 0.03   | 2    |
| Medulloblastoma                                      | 2.39     | 1.29       | 3.60   | 125 | Fibrolamellar Hepatocellular Carcinoma  | 1.03     | 1.02       | 0.05   | 8    |
| Mesothelioma                                         | 2.01     | 1.25       | 2.70   | 87  | Acute Myeloid Leukemia                  | 1.10     | 1.01       | 0.22   | 538  |
| Fibromatosis                                         | 1.24     | 1.24       | 0.18   | 4   | Hepatocellular Carcinoma                | 1.02     | 1.01       | 0.05   | 375  |
| Low-Grade Glioma/Astrocytoma                         | 1.88     | 1.23       | 2.08   | 86  | Colon Adenocarcinoma                    | 1.04     | 1.01       | 0.10   | 293  |
| Atypical Teratoid/Rhabdoid Tumor                     | 1.49     | 1.22       | 0.69   | 4   | Inflammatory Myofibroblastic Tumor      | 1.08     | 1.01       | 0.14   | 4    |
| Testicular Germ Cell Tumor                           | 1.31     | 1.17       | 0.53   | 155 | Acute Megakaryoblastic Leukemia         | 1.04     | 1.01       | 0.10   | 93   |
| Wilms Tumor                                          | 1.45     | 1.16       | 0.85   | 137 | Acute Leukemia Of Ambiguous Lineage     | 1.01     | 1.01       | 0.01   | 2    |
| Lung Squamous Cell Carcinoma                         | 1.42     | 1.16       | 1.02   | 498 | Leukemia, Unspecified Subtype           | 1.01     | 1.01       | 0.01   | 2    |
| Lung Adenocarcinoma                                  | 1.38     | 1.15       | 1.38   | 516 | Myeloproliferative Neoplasm             | 1.01     | 1.01       | 0.01   | 2    |
| Rhabdoid Tumor                                       | 1.15     | 1.15       | 0.156  | 2   | Juvenile Myelomonocytic Leukemia        | 1.01     | 1.00       | 0.03   | 4    |
| Myxofibrosarcoma                                     | 1.71     | 1.14       | 1.58   | 17  | Acute Lymphoblastic Leukemia            | 1.00     | 1.00       | 0.01   | 10   |
| Myoepithelial Carcinoma                              | 1.13     | 1.14       | 0.01   | 3   | Oligodendroglioma                       | 0.62     | 0.74       | 0.34   | 3    |
| Pancreatic Adenocarcinoma                            | 1.52     | 1.11       | 4.53   | 179 | Small Cell Lung Cancer                  | 0.81     | 0.09       | 1.7    | 79   |

**Supplemental Table 1. *ALK* RNA expression in neoplastic histologies.** *ALK* RNA expression quantified as the mean and median with standard deviation (SD) values of transcripts per million (TPM) with total number of samples (N) included in analysis. Retinoblastoma<sup>†</sup> was excluded from outlier analysis of *ALK* RNA expression due to small sample size of n=2.



**Supplemental Table 2**

| Normal Histology | Mean TPM | Median TPM | SD TPM | n    | Normal Histology | Mean TPM | Median TPM | SD TPM | n    |
|------------------|----------|------------|--------|------|------------------|----------|------------|--------|------|
| Pituitary        | 4.22     | 3.53       | 2.88   | 283  | Prostate         | 0.12     | 0.09       | 0.12   | 245  |
| Testis           | 3.16     | 3.08       | 1.34   | 361  | Skin             | 0.10     | 0.08       | 0.07   | 1305 |
| Colon            | 1.17     | 0.82       | 1.18   | 779  | Uterus           | 0.12     | 0.08       | 0.14   | 142  |
| Brain            | 0.95     | 0.76       | 0.85   | 2642 | Lung             | 0.11     | 0.08       | 0.12   | 578  |
| Nerve            | 0.62     | 0.47       | 0.66   | 619  | Fallopian Tube   | 0.10     | 0.08       | 0.05   | 9    |
| Esophagus        | 0.54     | 0.41       | 0.54   | 1445 | Vagina           | 0.17     | 0.07       | 0.4    | 156  |
| Salivary Gland   | 0.20     | 0.18       | 0.13   | 162  | Stomach          | 0.24     | 0.07       | 0.36   | 359  |
| Small Intestine  | 0.49     | 0.18       | 0.85   | 187  | Muscle           | 0.07     | 0.04       | 0.09   | 803  |
| Breast           | 0.23     | 0.14       | 0.34   | 459  | Artery           | 0.06     | 0.04       | 0.11   | 1335 |
| Bladder          | 0.18     | 0.13       | 0.14   | 21   | Heart            | 0.04     | 0.03       | 0.04   | 861  |
| Breast           | 0.23     | 0.13       | 0.34   | 459  | Spleen           | 0.04     | 0.03       | 0.03   | 241  |
| Cervix           | 0.26     | 0.12       | 0.33   | 19   | Kidney           | 0.05     | 0.02       | 0.10   | 89   |
| Adrenal Gland    | 0.21     | 0.11       | 0.33   | 258  | Pancreas         | 0.02     | 0.02       | 0.02   | 328  |
| Adipose          | 0.18     | 0.11       | 0.22   | 1204 | Cells            | 0.02     | 0.02       | 0.02   | 678  |
| Thyroid          | 0.12     | 0.11       | 0.12   | 653  | Liver            | 0.02     | 0.01       | 0.03   | 226  |
| Ovary            | 0.13     | 0.10       | 0.10   | 180  | Blood            | 0.01     | 0.01       | 0.01   | 755  |

**Supplemental Table 2. *ALK* RNA expression in normal pediatric histologies.** *ALK* RNA expression quantified as the mean and median with standard deviation (SD) values of transcripts per million (TPM) with total number of samples (n) included in analysis.



**Supplemental Table 3**

|    | A                      | B                      | C                      | D                      | E                      | F                      | G        | H                      | I                      | J                      | K                      | L                      |
|----|------------------------|------------------------|------------------------|------------------------|------------------------|------------------------|----------|------------------------|------------------------|------------------------|------------------------|------------------------|
| 1  | Placenta               | Adrenal cortex         | Adrenal cortex         | Adrenal medulla        | Adrenal medulla        | Tonsil                 | Tonsil   | NB –post-chemotherapy  | NB –post-chemotherapy  | NB – post-chemotherapy | NB – post-chemotherapy | NB – post-chemotherapy |
| 2  | NB – post-chemotherapy | NB – post-chemotherapy | NB – diagnostic        | NB – diagnostic        | NB – diagnostic        | NB – diagnostic        | Placenta | NB – post-chemotherapy | NB – post-chemotherapy | NB – diagnostic        | NB – diagnostic        | NB – diagnostic        |
| 3  | NB – relapsed          | NB – relapsed          | NB – post-chemotherapy | NB – post-chemotherapy | NB – post-chemotherapy | NB – post-chemotherapy | Placenta | NB – diagnostic        | NB – diagnostic        | NB – relapsed          | NB – relapsed          | NB – post-chemotherapy |
| 4  | NB – post-chemotherapy | NB – post-chemotherapy | NB – post-chemotherapy | NB – post-chemotherapy | NB – relapsed          | NB – relapsed          | Placenta | NB – diagnostic        | NB – diagnostic        | NB –post-chemotherapy  | NB –post-chemotherapy  | Ganglio-neuroblastoma  |
| 5  | NB – diagnostic        | NB – diagnostic        | NB – relapsed          | NB – relapsed          | NB – diagnostic        | NB – diagnostic        | Placenta | Ganglio-neuroblastoma  | Ganglio-neuroblastoma  | Ganglio-neuroblastoma  | Ganglio-neuroblastoma  | NB – post-chemotherapy |
| 6  | NB – post-chemotherapy | NB – post-chemotherapy | NB – diagnostic        | NB – diagnostic        | NB – diagnostic        | NB – diagnostic        | Placenta | NB – diagnostic        | NB – diagnostic        | NB – post-chemotherapy | NB – post-chemotherapy | NB – diagnostic        |
| 7  | NB – post-chemotherapy | NB – post-chemotherapy | Ganglio-neuroblastoma  | Ganglio-neuroblastoma  | NB – diagnostic        | NB – diagnostic        | Placenta | NB – diagnostic        | NB – diagnostic        | Ganglioneuroma         | Ganglioneuroma         | NB – post-chemotherapy |
| 8  | NB – post-chemotherapy | NB – post-chemotherapy | NB – post-chemotherapy | NB – post-chemotherapy | Ganglio-neuroblastoma  | Ganglio-neuroblastoma  | Placenta | NB – diagnostic        | NB – diagnostic        | NB – diagnostic        | NB – diagnostic        | NB – diagnostic        |
| 9  | NB – post-chemotherapy | NB – post-chemotherapy | NB – diagnostic        | NB – diagnostic        | NB – post-chemotherapy | NB – post-chemotherapy | Placenta | NB – post-chemotherapy | NB – post-chemotherapy | NB – diagnostic        | NB – diagnostic        | NB – diagnostic        |
| 10 | NB – diagnostic        | NB – diagnostic        | NB – diagnostic        | NB – diagnostic        | NB – diagnostic        | NB – diagnostic        | Placenta | NB – diagnostic        | NB – diagnostic        | NB – relapsed          | NB – relapsed          | NB – diagnostic        |
| 11 | NB – diagnostic        | NB – diagnostic        | NB – post-chemotherapy | NB – post-chemotherapy | NB – diagnostic        | NB – diagnostic        | Placenta | NB – diagnostic        | NB – diagnostic        | NB – diagnostic        | NB – diagnostic        | NB – diagnostic        |
| 12 | NB – relapsed          | NB – relapsed          | NB – diagnostic        | NB – diagnostic        | Placenta               | Placenta               | Placenta | Placenta               | Placenta               | Placenta               | Placenta               | Placenta               |

**Supplemental Table 3. Legend for neuroblastoma tumor tissue microarray (TMA).** Tumor samples and healthy tissues were stained for ALK (D5F3). All neuroblastoma tumors are displayed as adjacent duplicate cores.

**Supplemental Table 4**

|   | A                  | B                  | C               | D               | E               | F             | G        | H                | I                | J              | K              | L               | M               |
|---|--------------------|--------------------|-----------------|-----------------|-----------------|---------------|----------|------------------|------------------|----------------|----------------|-----------------|-----------------|
| 1 | Placenta           | Adrenal Cortex     | Adrenal Cortex  | Adrenal Medulla | Adrenal Medulla | Aorta         | Aorta    | Artery           | Artery           | Bladder        | Bladder        | Bone marrow     | Bone marrow     |
| 2 | Brain (cerebellum) | Brain (cerebellum) | Brain (cortex)  | Brain, (cortex) | Breast          | Breast        | Placenta | Cervix Uteri     | Cervix Uteri     | Choroid plexus | Choroid plexus | Esophagus       | Esophagus       |
| 3 | Cornea             | Cornea             | Fallopian Tube  | Fallopian Tube  | Gallbladder     | Gallbladder   | Placenta | Epiphyseal plate | Epiphyseal plate | Heart          | Heart          | Kidney (cortex) | Kidney (cortex) |
| 4 | Kidney (medulla)   | Kidney (medulla)   | Colon           | Colon           | Liver           | Liver         | Placenta | Lung             | Lung             | Lymph Node     | Lymph Node     | Ovary           | Ovary           |
| 5 | Pancreas           | Pancreas           | Parathyroid     | Parathyroid     | Pituitary       | Pituitary     | Placenta | Prostate         | Prostate         | Salivary Gland | Salivary Gland | Skeletal Muscle | Skeletal Muscle |
| 6 | Skin               | Skin               | Small Intestine | Small Intestine | Smooth muscle   | Smooth muscle | Placenta | Spinal Cord      | Spinal Cord      | Spleen         | Spleen         | Stomach         | Stomach         |
| 7 | Testis             | Testis             | Thymus          | Thymus          | Thyroid Gland   | Thyroid Gland | Placenta | Tonsil           | Tonsil           | Ureter         | Ureter         | Uterus          | Uterus          |

**Supplemental Table 4. Legend for normal tissue microarray (TMA).** Tissue samples were stained for ALK (D5F3) and displayed as adjacent duplicate cores from each tissue unless listed as a single sample.

Supplemental Table 5

|                      | IgG<br>Geometric<br>Mean | ALK<br>Geometric<br>Mean | ALK:IgG<br>Geometric<br>Mean |
|----------------------|--------------------------|--------------------------|------------------------------|
| NB-1                 | 157                      | 104,993                  | 668.7                        |
| COG-N-424x           | 62.2                     | 1,721                    | 27.7                         |
| NB-SD                | 26.2                     | 391                      | 15.0                         |
| SK-N-AS              | 236                      | 835                      | 3.5                          |
| NGP <i>ALK</i><br>WT | 711                      | 6104                     | 8.6                          |
| NGP <i>ALK</i><br>KO | 587                      | 912                      | 1.6                          |
| RH-41                | 751                      | 5,275                    | 7.02                         |
| SW-48                | 1,582                    | 15,446                   | 9.76                         |
| HCT-116              | 304                      | 1,699                    | 5.59                         |

**Supplemental Table 5. Flow cytometry histogram geometric means.** ALK and IgG geometric means with corresponding ALK:IgG geometric mean ratios in xenograft models, and in neuroblastoma NGP *ALK* wild-type (WT) and NGP *ALK* knockout (KO) cell lines.

Supplemental Table 6

| Neuroblastoma<br>Cell Line | CDX0239-PBD<br>IC <sub>50</sub> (pM) | Free PBD IC <sub>50</sub><br>(pM) |
|----------------------------|--------------------------------------|-----------------------------------|
| NB-1                       | 16.1                                 | 342                               |
| NB-SD                      | 22.5                                 | 619                               |
| SK-N-AS                    | 5,070                                | 64.3                              |
| NGP ALK WT                 | 42.79                                | 31.08                             |
| NGP ALK KO                 | 24,400,000                           | 32.73                             |

Supplemental Table 6. IC<sub>50</sub> values of CDX0239-PBD and free PBD in neuroblastoma cell lines.

Supplemental Table 7

| Model      | Disease                                               | ALK Status       | MYCN Status    | TP53 Status      | CDX0239-PBD Dose (mg/kg) | n | Response            | Tumor Size p-value vs. Vehicle | Median KM (days) | KM p-value vs. Vehicle |
|------------|-------------------------------------------------------|------------------|----------------|------------------|--------------------------|---|---------------------|--------------------------------|------------------|------------------------|
| NB-1       | Neuroblastoma                                         | WT; Amplified    | Amplified      | WT               | 1                        | 5 | Complete Response   | <0.0001                        | >90              | 0.0017                 |
| NB-SD      | Neuroblastoma                                         | c.3522C>A:F1174L | Amplified      | c.527G>T_p.C176F | 1                        | 5 | Complete Response   | 0.0015                         | >70              | 0.0102                 |
| COG-N-424x | Neuroblastoma                                         | WT               | Amplified      | WT               | 1                        | 5 | Complete Response   | <0.0001                        | >50              | 0.0018                 |
| SK-N-AS    | Neuroblastoma                                         | WT               | Non-Amplified  | c.503A>G_p.H168R | 1                        | 5 | Partial Response    | 0.0008                         | 56               | 0.0463                 |
| NGP ALK WT | Neuroblastoma                                         | WT               | Amplified      | c.432C>G_p.R114G | 1                        | 5 | Complete Response   | <0.0001                        | >100             | 0.0019                 |
| NGP ALK KO | Neuroblastoma                                         | KO               | Amplified      | c.432C>G_p.R114G | 1                        | 5 | Progressive Disease | 0.3065                         | 32               | 0.0583                 |
| HCT-116    | Colorectal Carcinoma                                  | WT               | Not applicable | WT               | 1                        | 5 | Complete Response   | <0.0001                        | >40              | 0.0003                 |
| SW-48      | Colorectal Carcinoma                                  | WT               | Not applicable | WT               | 1                        | 5 | Complete Response   | <0.0001                        | >80              | 0.0023                 |
| RH-41      | Fusion-positive Rhabdomyosarcoma (PAX3::FOXO1 fusion) | WT               | Not applicable | WT               | 1                        | 5 | Complete Response   | <0.0001                        | >90              | 0.0012                 |

**Supplemental Table 7. Xenograft model genomic, treatment, and response data.** Xenografts used for *in vivo* studies listed with associated *ALK* status, *MYCN* status, *TP53* status, CDX0239-PBD dose in mg/kg, number of murine models enrolled per condition (n), tumor volume response, p-value for tumor size in CDX0239-PBD treatment group vs. normal saline vehicle treatment group, median Kaplan-Meier survival estimate (KM) in days, and p-value for median KM logrank in CDX0239-PBD treatment group vs normal saline vehicle treatment group.
